# Supplementary figures and images for: Convection Enhanced Delivery of the Oncolytic Adenovirus Delta24-RGD in Patients with Recurrent GBM: A Phase I Clinical Trial Including Correlative Studies
Source: PubMed Central journal article supplement — Clin Cancer Res. 2022 Feb 17;28(8):1572–85. doi: 10.1158/1078-0432.CCR-21-3324 (PMC9365362; doi:10.1158/1078-0432.ccr-21-3324), 2022-02-17

Supplemental figure 1

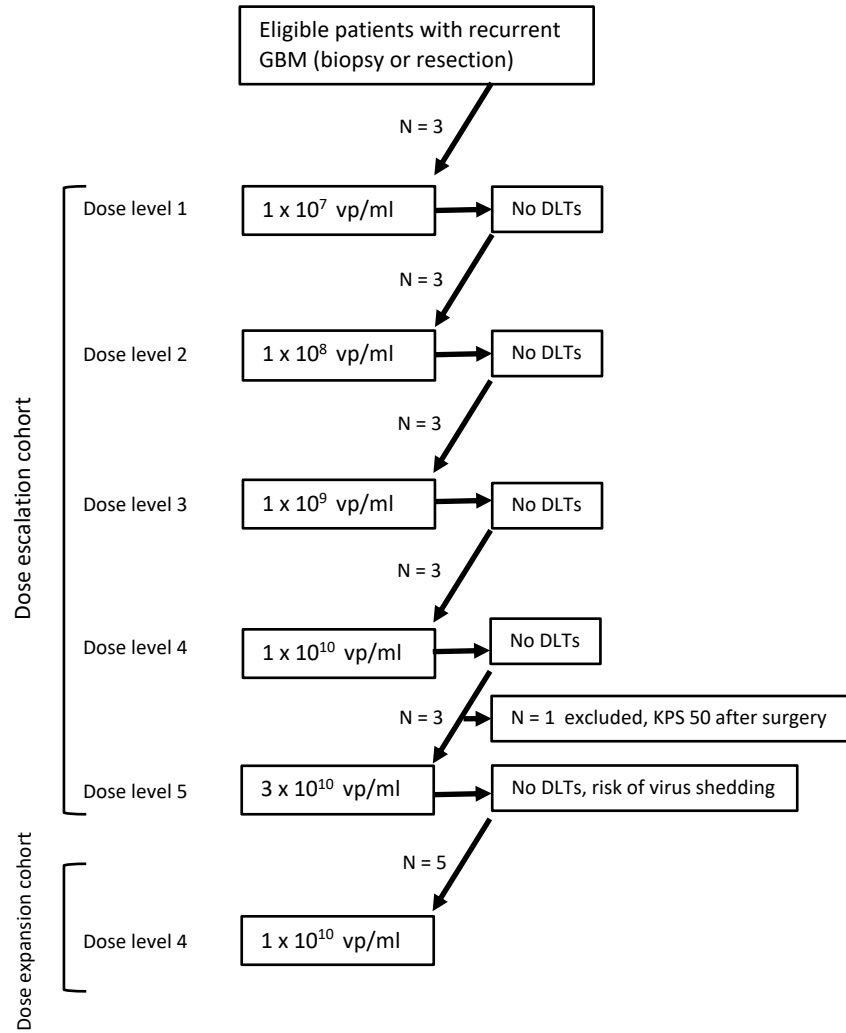

Supplement: ccr-21-3324_supplemental_figure_1_supp1.pdf [file ccr-21-3324_supplemental_figure_1_supp1.pdf]

Supplemental figure 2a

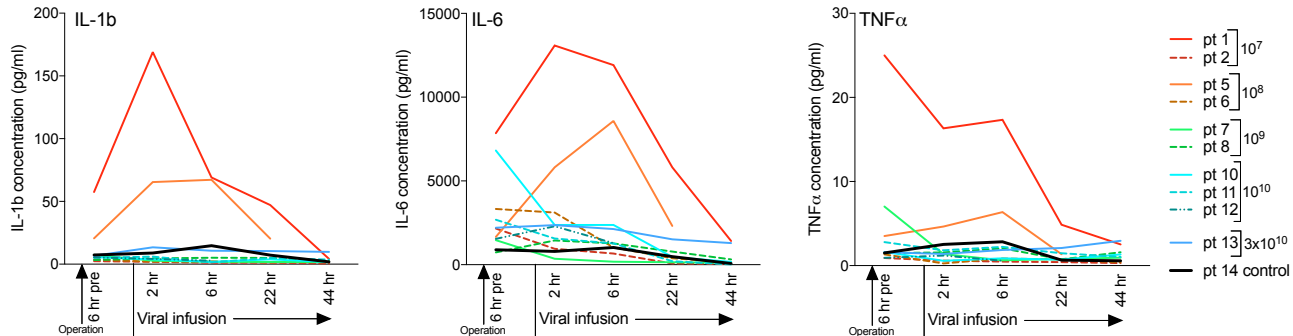

Supplement: ccr-21-3324_supplemental_figure_2a_supp2a.pdf [file ccr-21-3324_supplemental_figure_2a_supp2a.pdf]

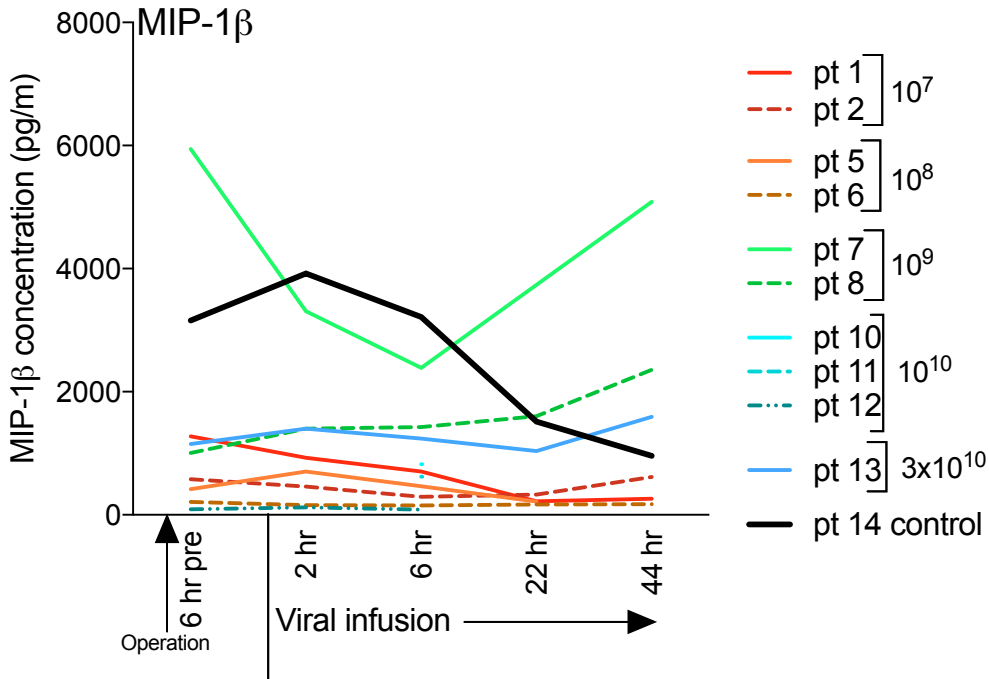

Supplement: ccr-21-3324_supplemental_figure_2b_supp2b.pdf [file ccr-21-3324_supplemental_figure_2b_supp2b.pdf]

Supplemental figure 3

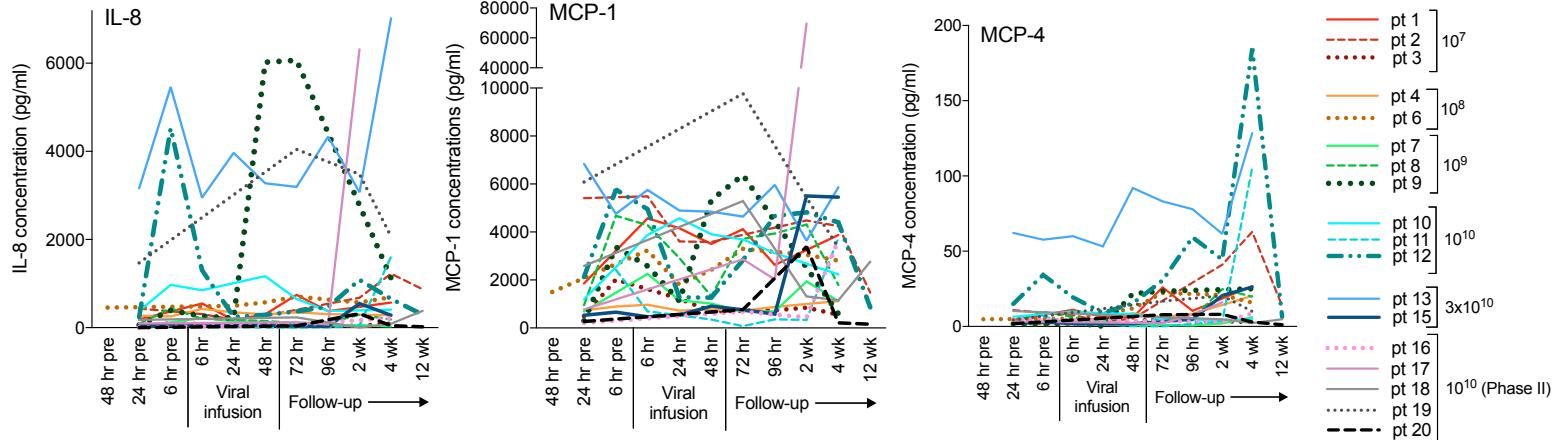

Supplement: ccr-21-3324_supplemental_figure_3_supp3.pdf [file ccr-21-3324_supplemental_figure_3_supp3.pdf]

Supplemental figure 4

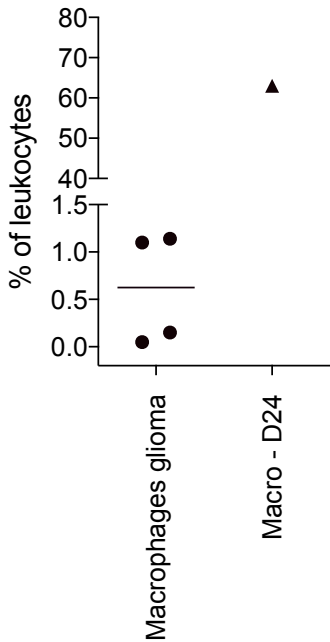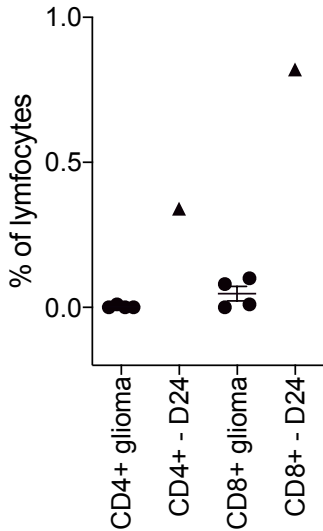

Supplement: ccr-21-3324_supplemental_figure_4_supp4.pdf [file ccr-21-3324_supplemental_figure_4_supp4.pdf]

Supplemental figure 5

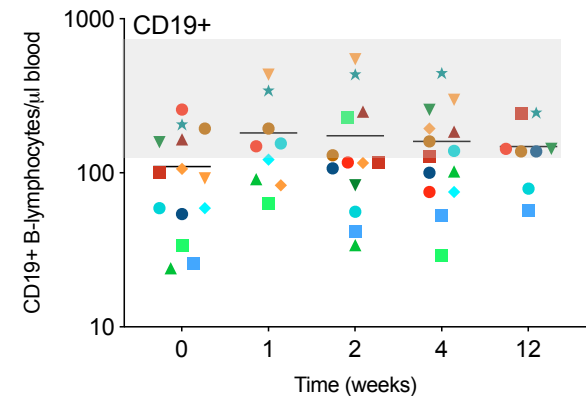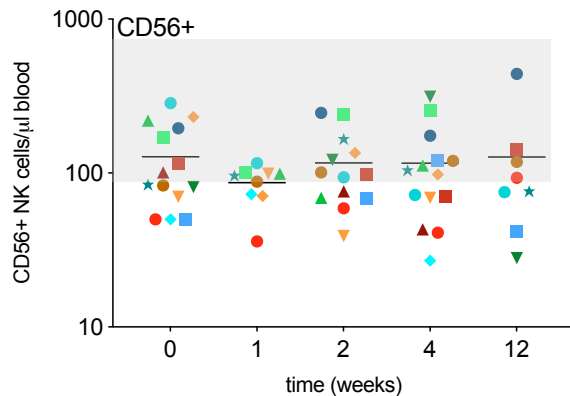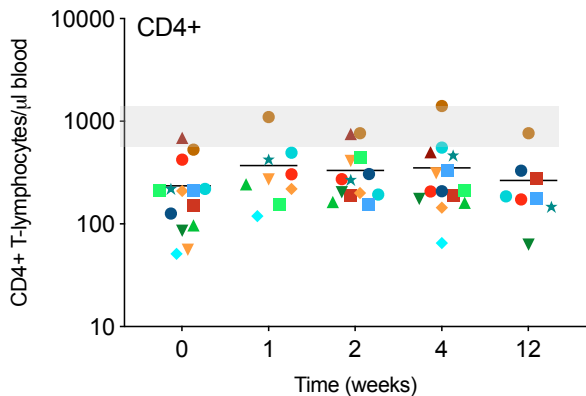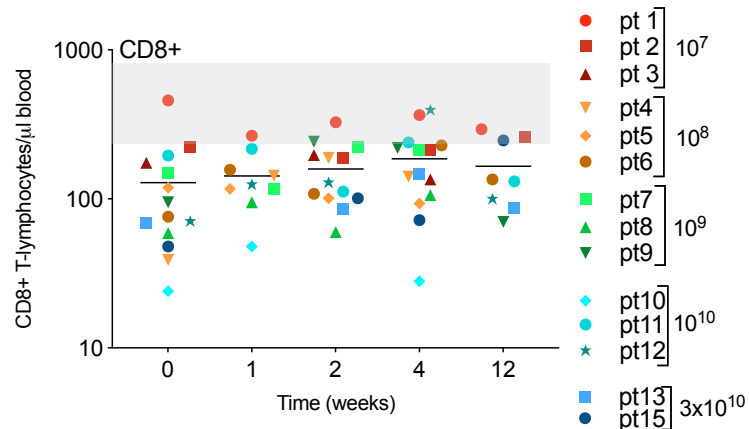

Supplement: ccr-21-3324_supplemental_figure_5_supp5.pdf [file ccr-21-3324_supplemental_figure_5_supp5.pdf]

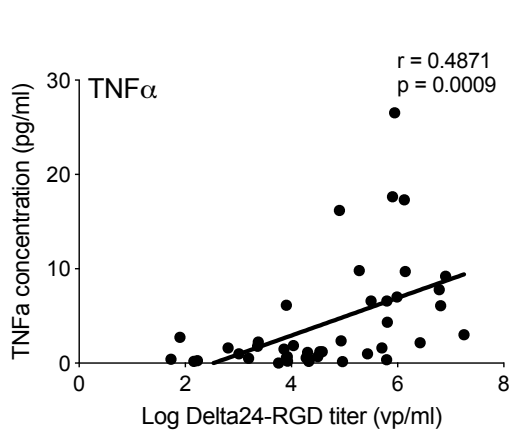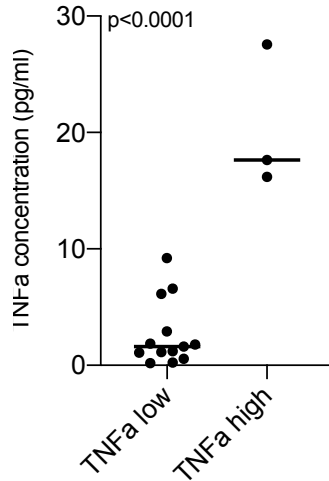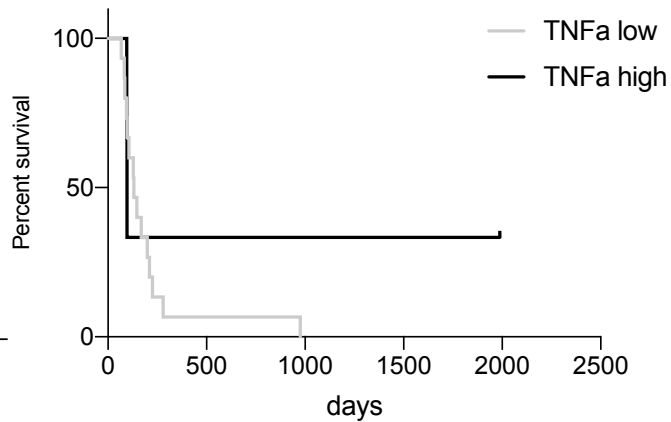

Supplement: ccr-21-3324_supplemental_figure_6_supp6.pdf [file ccr-21-3324_supplemental_figure_6_supp6.pdf]
